# Supplementary material for: Metal–Organic Framework Derived Ni2P/FeP@NPC Heterojunction as Stability Bifunctional Electrocatalysts for Large Current Density Water Splitting
Source: MDPI journal article supplement (doi:10.3390/molecules28052280), 2023-02-28
Supplement: s1 [file s1]

# ***Supporting Information***

## **Metal–organic framework derived Ni<sub>2</sub>P/FeP@NPC heterojunction as stability bifunctional electrocatalysts for large current density water splitting**

Huimin Jiang<sup>1</sup>, Shuo Zhang<sup>1</sup>, Qiuju Fu<sup>1</sup>, Liting Yan<sup>2</sup>, Jun Zhang<sup>1\*</sup>, Xuebo Zhao<sup>1,2\*</sup>

<sup>1</sup> College of Chemical Engineering, China University of Petroleum (East China), Qingdao, 266580, China

<sup>2</sup> School of Materials Science and Engineering, Qilu University of Technology (Shandong Academy of Sciences), 250353, Jinan, China

\* Corresponding author.

E-mails: zhangj@upc.edu.cn (J.Z.);

zhaoxuebo@upc.edu.cn (X. Zhao)

### ***1. Characterization***

Powder X-ray diffraction (XRD) data were obtained on an XRD diffractometer (Rigaku, Japan) with Cu K $\alpha$  radiation. The SEM images were acquired using a Merlin microscope (Carl Zeiss, Germany). The TEM images were obtained using a JEM2100F transmission electron microscope (JEOL Co. Ltd, Japan). Nitrogen sorption isotherms were measured at 77 K using an Autosorb volumetric gas sorption analyzer (Quantachrome, USA). All of the samples were degassed in vacuum for 12 h at 100 °C to fully remove guest molecules prior to analysis.

### ***2. Chemicals***

Piperazine (C<sub>4</sub>H<sub>10</sub>N<sub>2</sub>, 95%), phosphorous acid (AR, 99%) were purchased from Shanghai Macklin Biochemical Co., Ltd. Hydrochloric acid (HCl, 37%) was purchased from Sinopharm Chemistry. Iron(II) acetate (C<sub>4</sub>H<sub>6</sub>O<sub>4</sub>Fe, 98%) and nickel acetate (Ni(CH<sub>3</sub>COO)<sub>2</sub>, 98%) were purchased from Energy Chemical.

### ***3. Electrochemical experiments***

Electrochemical measurements were performed on a CHI 760E electrochemical workstation (CH Instrument, Chenhua Co., Shanghai, China). A conventional three-electrode system was adopted, a graphite rod as the counter electrode, and a mercuric oxide electrode (Hg/HgO) electrode as the reference electrode. Herein, all of the potentials were normalized to the reversible hydrogen electrode (RHE).

For typically preparing the catalyst ink, 10 mg of the catalyst was put into the mixture containing 0.45 mL of ethanol, 0.45 mL of water and 100  $\mu\text{L}$  of Nafion (5 wt%). Next, the mixture was further ultrasonicated for at least 30 min to obtain a homogeneous suspension. After that, the as-prepared ink was drop casted onto nickel foam to give a catalyst loading of  $0.2\text{ mg cm}^{-2}$ . In the controls, commercial Pt/C and  $\text{RuO}_2$  catalysts modified electrodes were constructed in a similar way with the mass loading of  $0.2\text{ mg cm}^{-2}$ .

#### ***4. Computational methods***

Density functional theory (DFT) calculations were implemented in the Vienna ab initio simulation software package (VASP) and performed by applying the plane-wave pseudopotential technique.[1] The electron exchange-correlation energy was simulated by the Perdew-Burke-Ernzerhof (PBE) functional within the generalized gradient approximation (GGA).[2] Utilizing the projection augmented wave (PAW) pseudopotentials to describe the ion-electron interactions.[3] All the structures were relaxed using the conjugate gradient method until the force component on each atom was less than  $0.02\text{ eV/\AA}$ , and the total energy convergence criterion of the self-consistent field method was set to  $10^{-5}\text{ eV}$ .

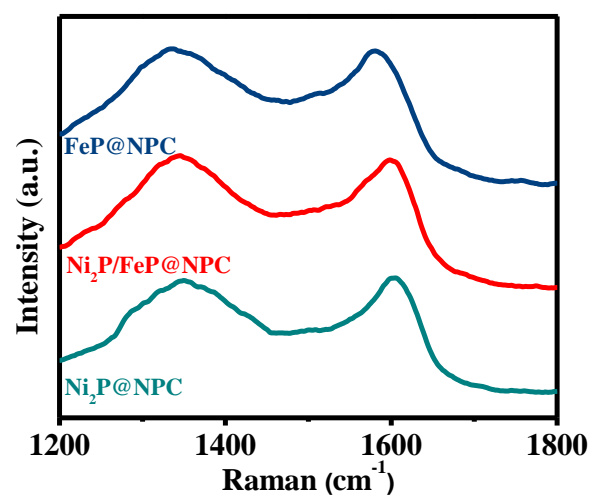

**Figure S1.** Raman patterns of Ni<sub>2</sub>P@NPC, Ni<sub>2</sub>P/FeP@NPC and FeP@NPC.

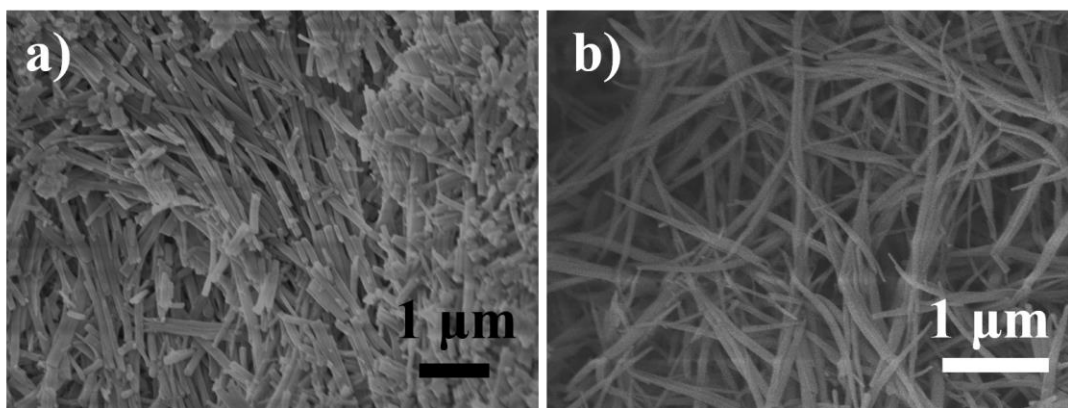

**Figure S2.** (a) SEM images of  $\text{Ni}_2\text{P}@NPC$  and (b)  $\text{FeP}@NPC$ .

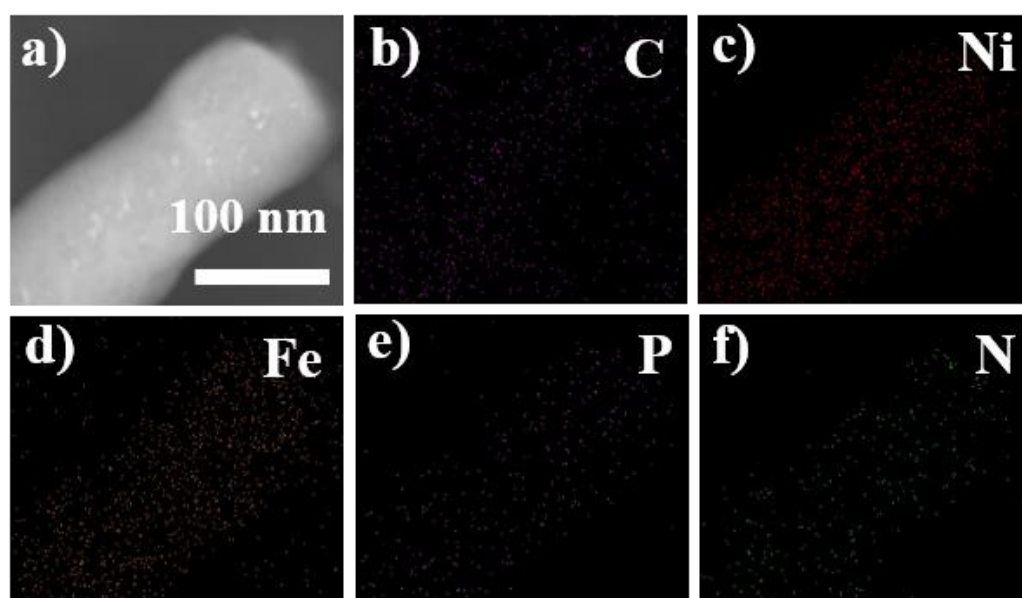

**Figure S3.** a) TEM image of  $\text{Ni}_2\text{P}/\text{FeP}@NPC$  and the corresponding EDX element mapping for b) C, c) Ni, d) Fe, e) P and f) N.

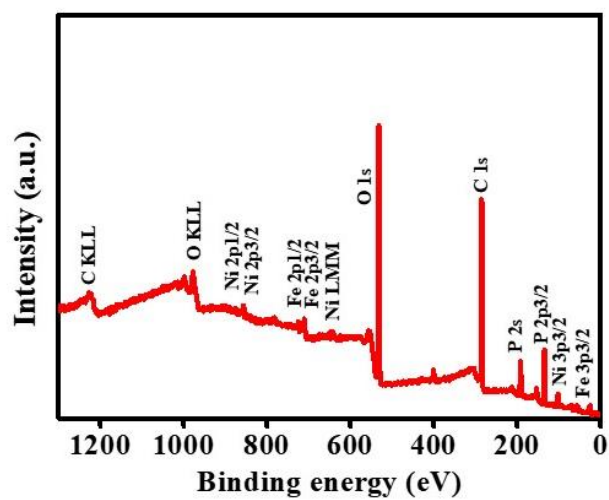

**Figure S4.** Survey scan of Ni<sub>2</sub>P/FeP@NPC.

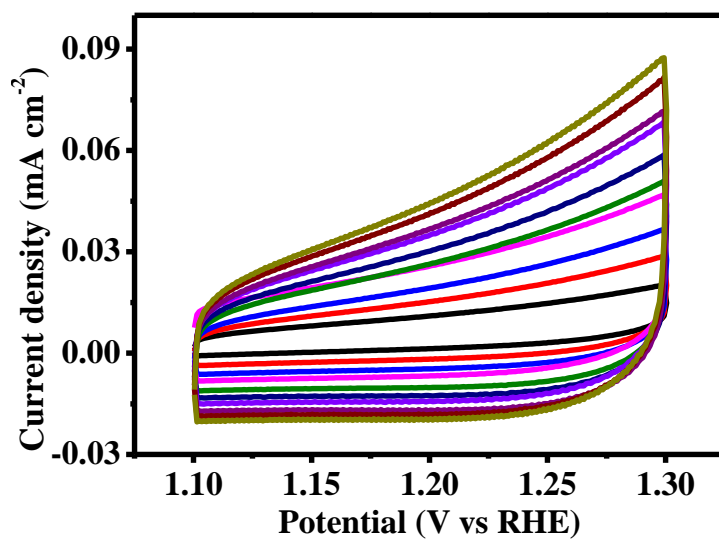

**Figure S5.** Cyclic voltammograms for Ni<sub>2</sub>P@NPC with different scan rates from 10 to 100 mV s<sup>-1</sup> in the potential range of 1.1-1.30 V versus RHE.

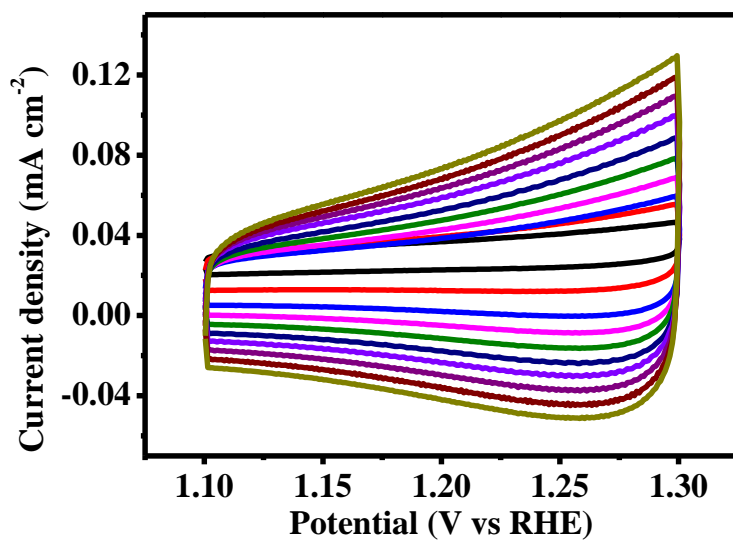

**Figure S6.** Cyclic voltammograms for FeP@NPC with different scan rates from 10 to 100 mV s<sup>-1</sup> in the potential range of 1.1-1.30 V versus RHE.

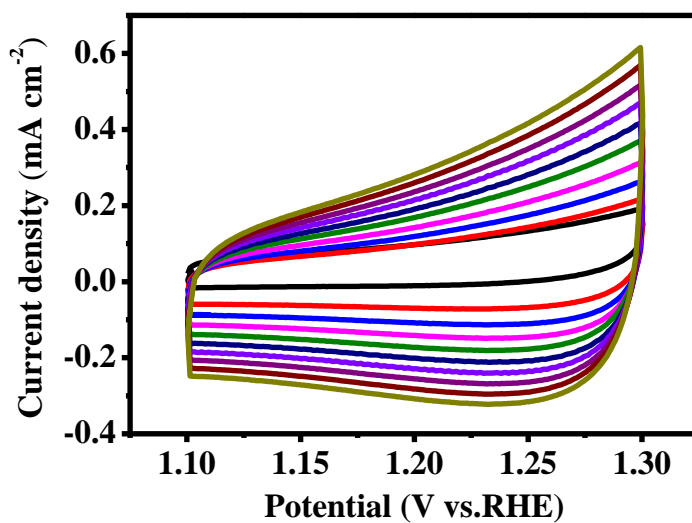

**Figure S7.** Cyclic voltammograms for Ni<sub>2</sub>P/FeP@NPC with different scan rates from 10 to 100 mV s<sup>-1</sup> in the potential range of 1.1-1.30 V versus RHE.

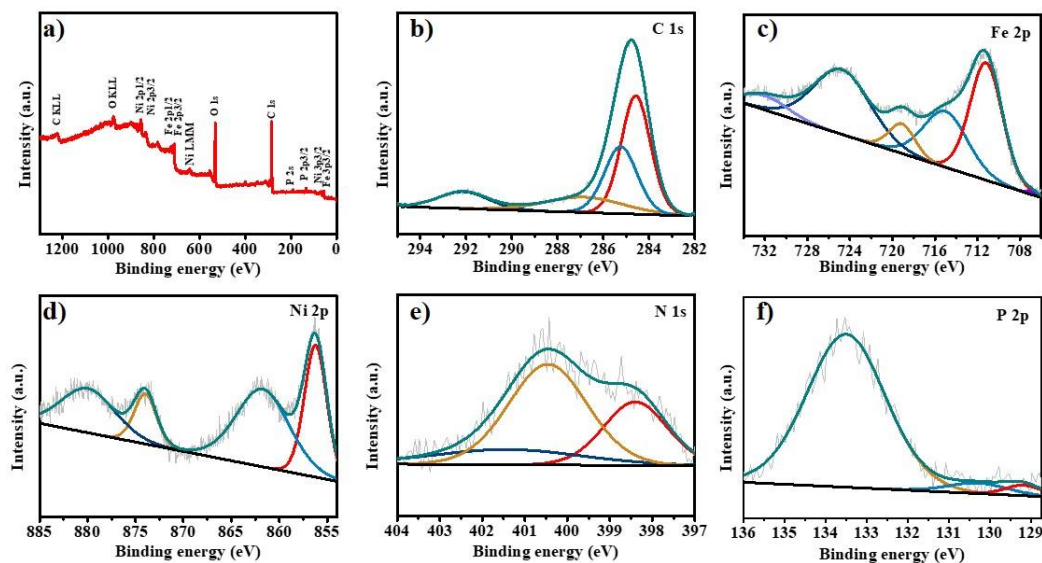

**Figure S8.** (a) Survey scan of Ni<sub>2</sub>P/FeP@NPC; High-resolution XPS spectra of b) C, c) Fe d) Ni, e) N and f) P in Ni<sub>2</sub>P/FeP@NPC.

**Table S1.** Comparison of the OER activities with available robust catalysts.

| OER catalysts                                                             | Electrolytes | $\eta_{10}$ , OER (mV) | References |
|---------------------------------------------------------------------------|--------------|------------------------|------------|
| MoS <sub>2</sub> -NiS <sub>2</sub> /graphene                              | 1.0 M KOH    | 320                    | 4          |
| CoS <sub>x</sub> @Cu <sub>2</sub> MoS <sub>4</sub> -MoS <sub>2</sub> /NSG | 1.0 M KOH    | 351.4                  | 5          |
| Co-Ru-MoS <sub>2</sub>                                                    | 1.0 M KOH    | 308                    | 6          |
| CoSAs-MoS <sub>2</sub> /TiN NRs                                           | 1.0 M KOH    | 340.6                  | 7          |
| P@pCoP <sub>c-1</sub> /Co <sub>3</sub> O <sub>4</sub>  CC                 | 1.0 M KOH    | 320                    | 8          |
| CoP-B                                                                     | 1.0 M KOH    | 297                    | 9          |
| NiSe <sub>2</sub> /Ni <sub>3</sub> Se <sub>4</sub> /NF                    | 1.0 M KOH    | 309                    | 10         |
| Ni <sub>2</sub> P/FeP@NPC                                                 | 1.0 M KOH    | 273                    | This work  |

**Table S2.** Comparison of the overall water splitting activities with available robust bifunctional catalysts.

| Catalysts                                                                                                                         | Electrolytes | Voltage at $\eta_{10}$<br>(V) | References |
|-----------------------------------------------------------------------------------------------------------------------------------|--------------|-------------------------------|------------|
| Co <sub>9</sub> S <sub>8</sub> @MoS <sub>2</sub> couple                                                                           | 1.0 M KOH    | 1.67                          | 11         |
| CoSAs-MoS <sub>2</sub> /TiN NRs                                                                                                   | 1.0 M KOH    | 1.65                          | 7          |
| P@pCoP <sub>c-1</sub> /Co <sub>3</sub> O <sub>4</sub>  CC                                                                         | 1.0 M KOH    | 1.672                         | 8          |
| Ni <sub>0.7</sub> Fe <sub>0.3</sub> PS <sub>3</sub> @MXene  <br>Ni <sub>0.9</sub> Fe <sub>0.1</sub> PS <sub>3</sub> @MXene couple | 1.0 M KOH    | 1.65                          | 9          |
| NiCo <sub>2</sub> O <sub>4</sub>                                                                                                  | 1.0 M KOH    | 1.65                          | 13         |
| EG/Co <sub>0.85</sub> Se/NiFe-LDH                                                                                                 | 1.0 M KOH    | 1.67                          | 14         |
| Ni <sub>2</sub> P/FeP@NPC                                                                                                         | 1.0 M KOH    | 1.64                          | This work  |

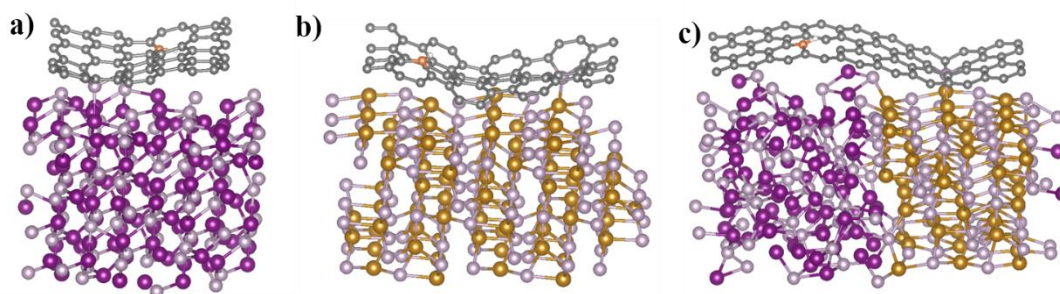

**Figure S9.** Atomic models of a) Ni<sub>2</sub>P@NPC, b) FeP@NPC and C) Ni<sub>2</sub>P/FeP@NPC

(gray: C, purple: Ni, brown: Fe, pink: P, orange: N, white: H).



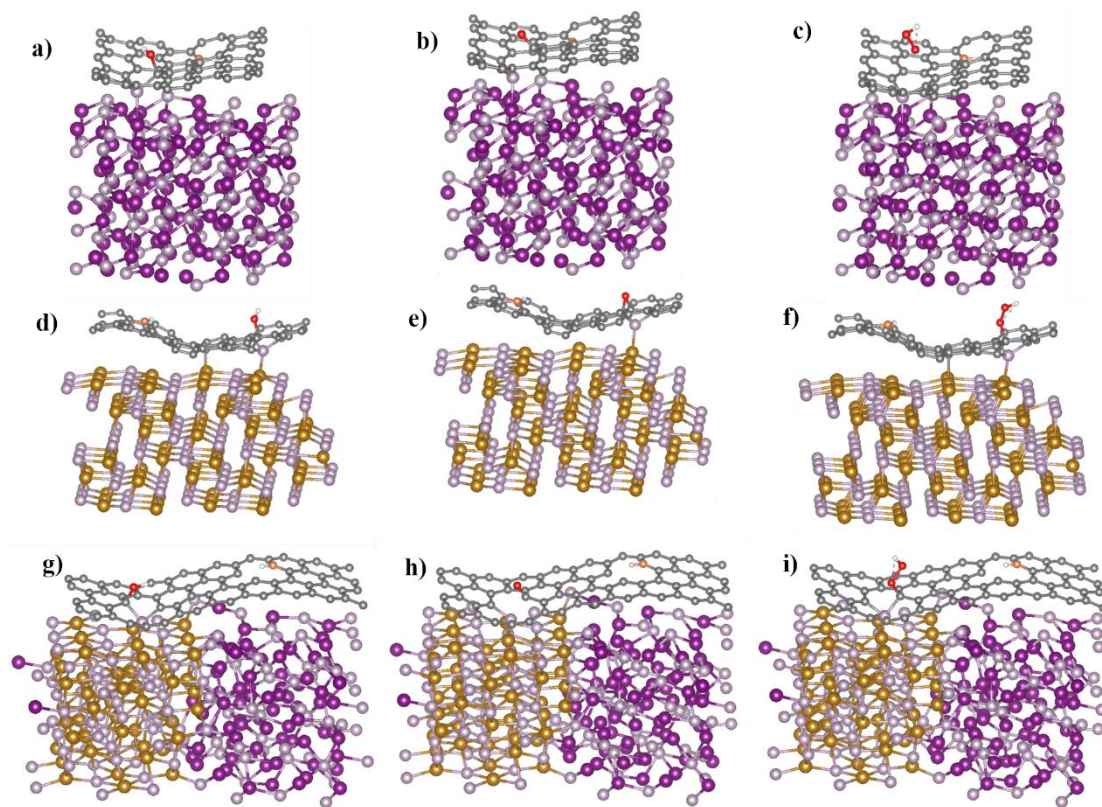

**Figure S10.** Atomic models of a), b) and c)  $\text{Ni}_2\text{P}@NPC$ , d), e) and f)  $\text{FeP}@NPC$  and g), h) and i)  $\text{Ni}_2\text{P}/\text{FeP}@NPC$  absorbed  $\text{OH}$ ,  $\text{O}$  and  $\text{OOH}$  intermediates (gray: C, purple: Ni, brown: Fe, pink: P, orange: N, white: H, red: O).

## References

- [1] G. Kresse, J. Furthmüller, *Phys. Rev. B* **1996**, 54, 11169.
- [2] J. P. Perdew, K. Burke, M. Ernzerhof, *Phys. Rev. Lett.* **1996**, 77, 3865.
- [3] P. Blöchl, *Phys. Rev. B* **1994**, 50, 17953.
- [4] S. P. Lonkar, V. V. Pillai, S. M. Alhassan, *Mater. Adv.* **2020**, 1, 794.
- [5] D. C. Nguyen, D. T. Tran, T. L. L. Doan, D. H. Kim, N. H. Kim, J. H. Lee, *Adv. Energy Mater.* **2020**, 10, 1903289.
- [6] I. S. Kwon, T. T. Debela, I. H. Kwak, Y. C. Park, J. Seo, J. Y. Shim, S. J. Yoo, J. G. Kim, J. Park, H. S. Kang, *Small* **2020**, 16, 2000081.
- [7] T. L. L. Doan, D. C. Nguyen, S. Prabhakaran, D. H. Kim, D. T. Tran, N. H. Kim, J. H. Lee, *Adv. Funct. Mater.* **2021**, 31, 2100233.
- [8] Y. Kim, D. Kim, J. Lee, L. Y. S. Lee, D. K. Ng, *Adv. Funct. Mater.* **2021**, 31, 2103290.
- [9] G. Yuan, J. Bai, L. Zhang, X. Chen, L. Ren, *Appl. Catal., B* **2021**, 284, 119693.
- [10] L. Tan, J. Yu, H. Wang, H. Gao, X. Liu, L. Wang, X. She, T. Zhan, *Appl. Catal. B: Environ.* **2022**, 303, 120915.
- [11] J. Bai, T. Meng, D. Guo, S. Wang, B. Mao, M. Cao, *ACS Appl. Mater. Interfaces* **2018**, 10, 1678.
- [12] C. F. Du, K. N. Dinh, Q. Liang, Y. Zheng, Y. Luo, J. Zhang, Q. Yan, *Adv. Energy Mater.* **2018**, 8, 1801127.
- [13] X. Gao, H. Zhang, Q. Li, X. Yu, Z. Hong, X. Zhang, *Angew. Chem. Int. Ed.* **2016**, 55, 6290-6294.
- [14] Y. Hou, M. R. Lohe, J. Zhang, S. Liu, X. Zhuang, X. Feng, *Energy Environ. Sci.* **2018**, 9, 478-483.
